# Supplementary material for: Pressurized liquid extraction of chlorinated polycyclic aromatic hydrocarbons from soil samples using aqueous solutions
Source: Royal Society of Chemistry journal article supplement (doi:10.1039/c6ra13973f), 2016-01-01
Supplement: c6ra13973f1.pdf [file c6ra13973f1.pdf]

## SUPPORTING INFORMATION

Pressurized liquid extraction of chlorinated polycyclic aromatic hydrocarbons from soil samples using aqueous solutions

*Xianli Wang, Junfeng Wu\*, Biao Liu*

(School of Municipal and Environmental Engineering, Henan University of Urban Construction, Pingdingshan, 467036, China)

\* Corresponding author. Tel.: +86 375 2089079

*E-mail addresses:* [wjfhncj2015@163.com](mailto:wjfhncj2015@163.com) (J.F. Wu)

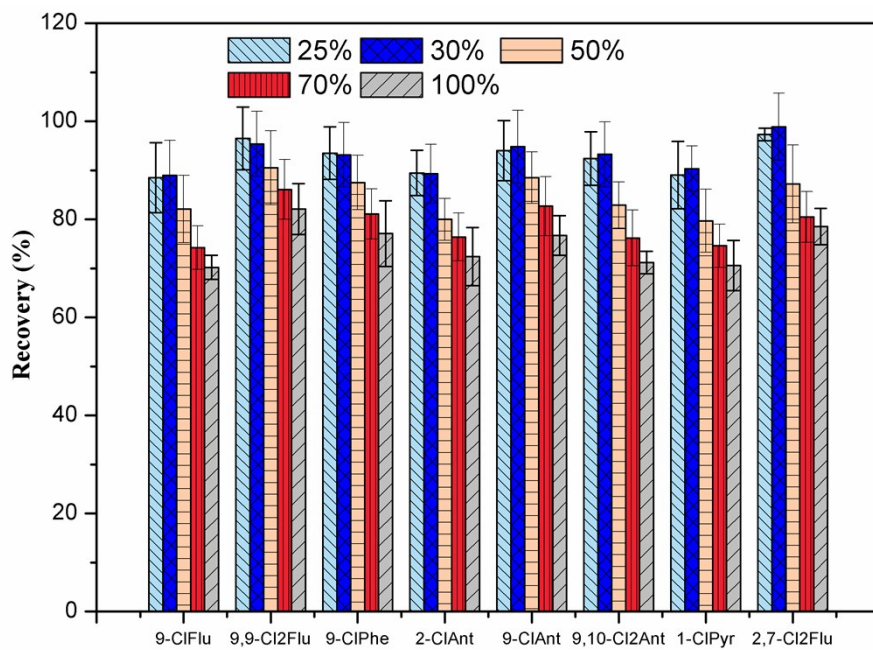

Figure S1. The effect of the content of acetone on extraction efficiency.

**Table S1** Comparison of Cl-PAHs concentrations (ng/g, dw) found in a non-spiked dust sample and a non-spiked sediment sample using two different extraction approaches.

| Compound                 | PLE (water/acetone, 75:25, v/v) |              |               |              | Soxhlet-extraction (dichloromethane/ hexane, 3:1, v/v) |              |               |              |
|--------------------------|---------------------------------|--------------|---------------|--------------|--------------------------------------------------------|--------------|---------------|--------------|
|                          | Dust                            |              | Sediment      |              | Dust                                                   |              | Sediment      |              |
|                          | Concentration                   | RSD (n=3, %) | Concentration | RSD (n=3, %) | Concentration                                          | RSD (n=3, %) | Concentration | RSD (n=3, %) |
| 9-ClFlu                  | 4.99                            | 4.1          | 5.85          | 2.6          | 4.28                                                   | 5.7          | 5.32          | 9.6          |
| 9,9-Cl <sub>2</sub> Flu  | 2.15                            | 5.2          | 3.12          | 2.2          | 2.09                                                   | 10.4         | 3.01          | 6.8          |
| 9-ClPhe                  | ND                              | -            | 1.15          | 3.4          | ND                                                     | -            | 1.02          | 10.2         |
| 2-ClAnt                  | ND                              | -            | ND            | -            | ND                                                     | -            | ND            | -            |
| 9-ClAnt                  | ND                              | -            | ND            | -            | ND                                                     | -            | ND            | -            |
| 9,10-Cl <sub>2</sub> Ant | 3.24                            | 1.8          | ND            | -            | 3.22                                                   | 6.3          | ND            | -            |
| 1-ClPyr                  | 7.88                            | 2.5          | 12.7          | 2.9          | 8.23                                                   | 11.2         | 12.0          | 5.8          |
| 2,7-Cl <sub>2</sub> Flu  | ND                              | -            | ND            | -            | ND                                                     | -            | ND            | -            |
